# Supplementary material
Source: publisher site journal article supplement (https://www.dovepress.com/article/456486)
Supplement: Supplementary file 1 [file get_supplementary_file.php]

**Table S1** Microstate parameters of eLLD, rLLD and HCs.

| **Microstate** | **eLLD** | **rLLD** | **HCs** | **Interaction** | | |
| --- | --- | --- | --- | --- | --- | --- |
|  | ***F*** | ***p*** | **η²** |
| **Duration (s)** |  |  |  | 3.462 | **0.011** | 0.083 |
| A | 0.060±0.01 | 0.061±0.01 | 0.062±0.01 |  |  |  |
| B | 0.060±0.01 | 0.058±0.01 | 0.060±0.01 |  |  |  |
| C | 0.061±0.02 | 0.062±0.01 | 0.068±0.02 |  |  |  |
| D | 0.082±0.04 | 0.058±0.01 | 0.067±0.02 |  |  |  |
| **Occurrence (s−1)** |  |  |  | 1.740 | 0.132 | 0.043 |
| A | 3.677±1.28 | 4.313±1.01 | 3.933±1.16 |  |  |  |
| B | 3.839±1.04 | 4.144±0.79 | 3.884±0.87 |  |  |  |
| C | 3.577±0.93 | 4.446±1.00 | 4.007±0.88 |  |  |  |
| D | 4.116±0.71 | 3.732±1.07 | 3.839±1.04 |  |  |  |
| **Coverage (%)** |  |  |  | 2.914 | **0.018** | 0.070 |
| A | 0.225±0.10 | 0.266±0.10 | 0.243±0.08 |  |  |  |
| B | 0.230±0.07 | 0.240±0.07 | 0.231±0.06 |  |  |  |
| C | 0.221±0.09 | 0.277±0.09 | 0.267±0.11 |  |  |  |
| D | 0.324±0.15 | 0.218±0.09 | 0.259±0.10 |  |  |  |

Note: eLLD: patients with episodic LLD; rLLD: patients with remitted LLD; HCs: healthy controls. Bold font indicates *p*＜0.05.
